# Supplementary material
Source: publisher figshare collection journal article supplement (https://acs.figshare.com/ndownloader/files/12462269)
Supplement: Supplementary file 1 [file 12462269]

## Supporting information

### Synthesis of highly biocompatible and temperature responsive physical gels for cryopreservation and 3D cell culture

*Masanori Nagao,<sup>1,2</sup> Jayeeta Sengupta<sup>1</sup>, Diana Diaz-Dussan<sup>1</sup>, Madeleine Adam<sup>3</sup>, Meng  
Wu<sup>1</sup>, Jason Acker<sup>4,5</sup>, Robert Ben<sup>3</sup>, Kazuhiko Ishihara<sup>6</sup>, Hongbo Zeng<sup>1</sup>, Yoshiko Miura<sup>2</sup>  
and Ravin Narain<sup>1\*</sup>*

*<sup>1</sup>Department of Chemical and Materials Engineering, University of Alberta, Edmonton,  
Alberta, Canada*

*<sup>2</sup>Department of Chemical Engineering, Kyushu University, Fukuoka, Japan*

*<sup>4</sup>Department of Laboratory Medicine and Pathology, University of Alberta, Edmonton,  
Alberta, Canada*

*<sup>5</sup>Centre for Innovation, Canadian Blood Services, Edmonton, Alberta, Canada*

*<sup>3</sup>Department of Chemistry and Biomolecular Sciences, University of Ottawa, Ottawa,  
Canada*

*<sup>6</sup>Department of Materials Engineering, The University of Tokyo, Tokyo, Japan*

\*Email: narain@ualberta.ca

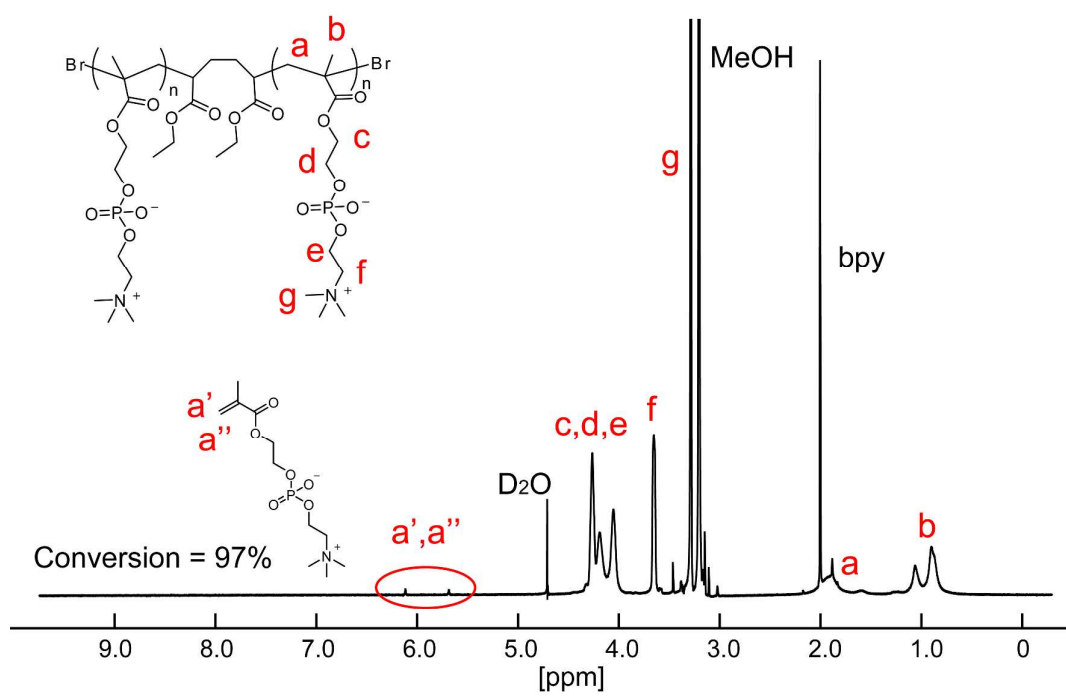

Figure S1.  $^1\text{H}$  NMR spectrum of Br-MPC<sub>243</sub>-Br after polymerization.

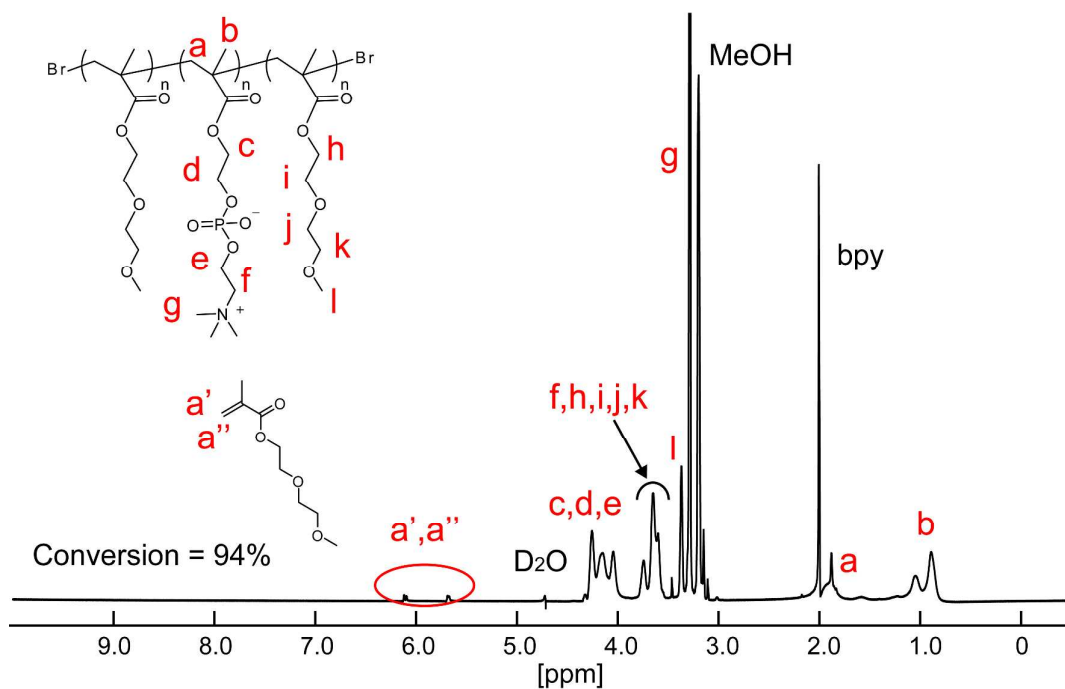

Figure S2.  $^1\text{H}$  NMR spectrum of  $\text{DEGMA}_{113}\text{-}b\text{-MPC}_{243}\text{-}b\text{-DEGMA}_{113}$  after polymerization.

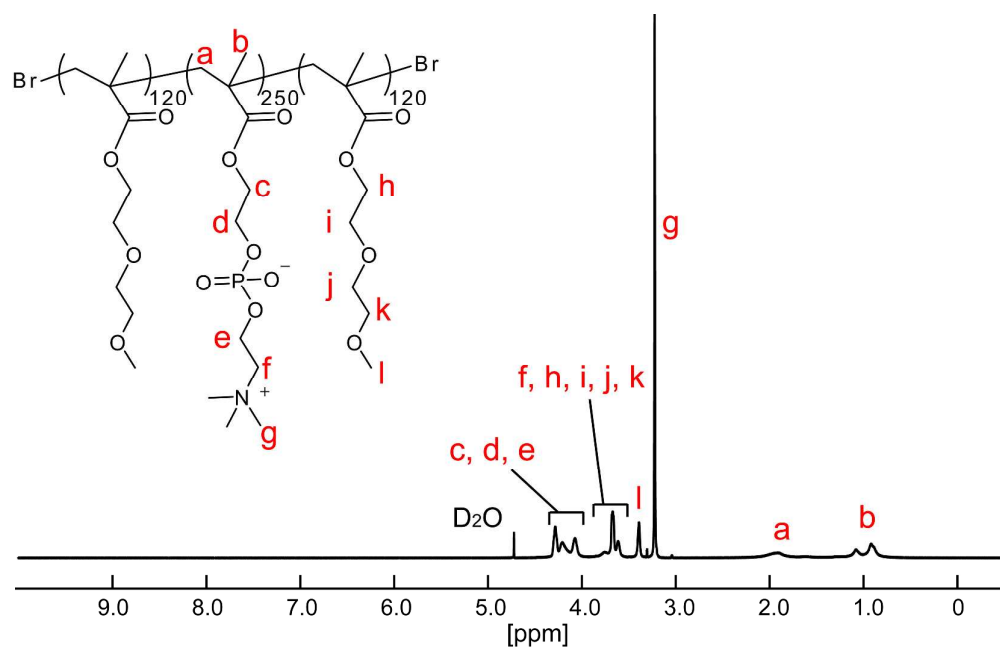

Figure S3.  $^1\text{H}$  NMR spectrum of  $\text{DEGMA}_{113}\text{-MPC}_{243}\text{-DEGMA}_{113}$  after purification.

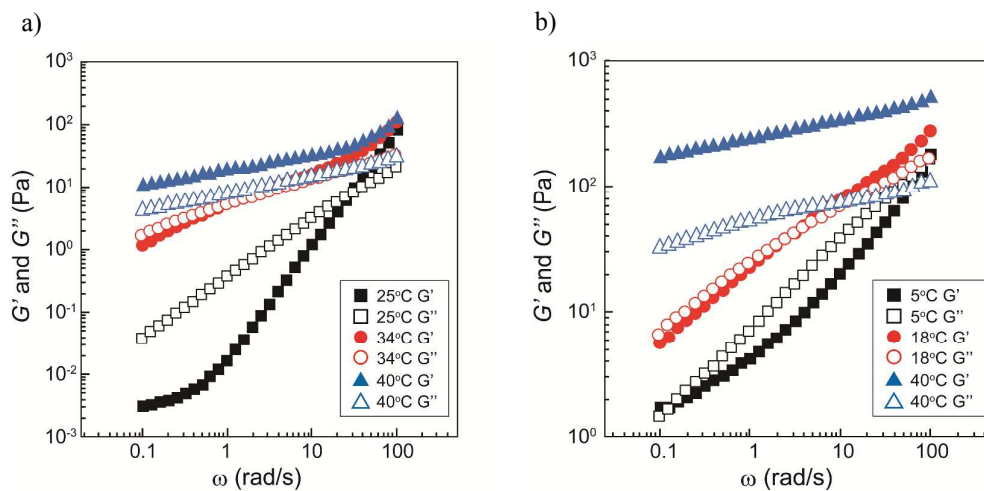

Figure S4. Frequency dependences of the dynamic shear moduli ( $G'$  and  $G''$ ) for the a) 15 wt% and b) 25 wt% DEGMA<sub>113</sub>–MPC<sub>243</sub>–DEGMA<sub>113</sub> solution in PBS measured at strain of 1% and three indicated temperatures.

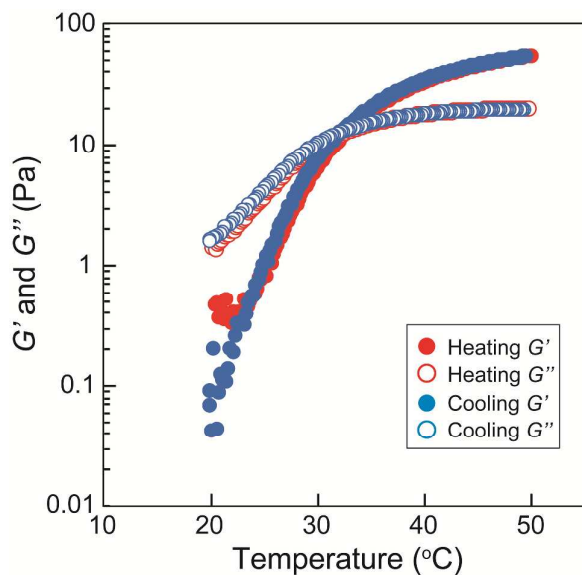

Figure S5. Temperature-dependent dynamic shear moduli ( $G'$  and  $G''$ ) for the 15 wt% DEGMA<sub>113</sub>–MPC<sub>243</sub>–DEGMA<sub>113</sub> solution in PBS buffer measured at a heating rate of 2 °C/min, at strain of 1% and with angular frequency of 10 rad/s.

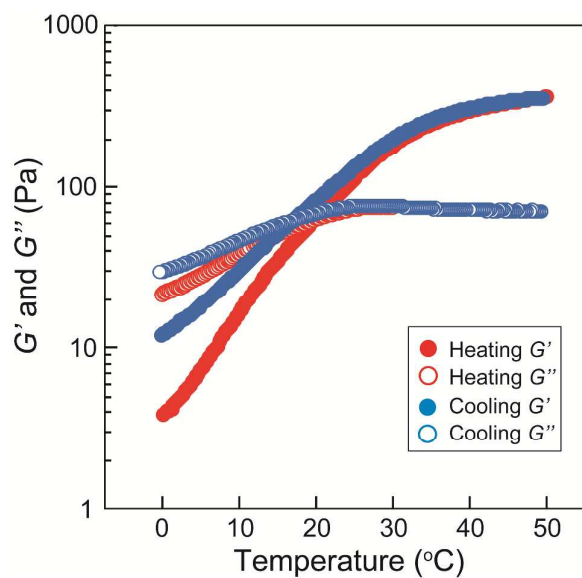

Figure S6. Temperature-dependent dynamic shear moduli ( $G'$  and  $G''$ ) for the 25 wt% DEGMA<sub>113</sub>–MPC<sub>243</sub>–DEGMA<sub>113</sub> solution in PBS buffer measured at a heating rate of 2 °C/min, at strain of 1% and with angular frequency of 10 rad/s.

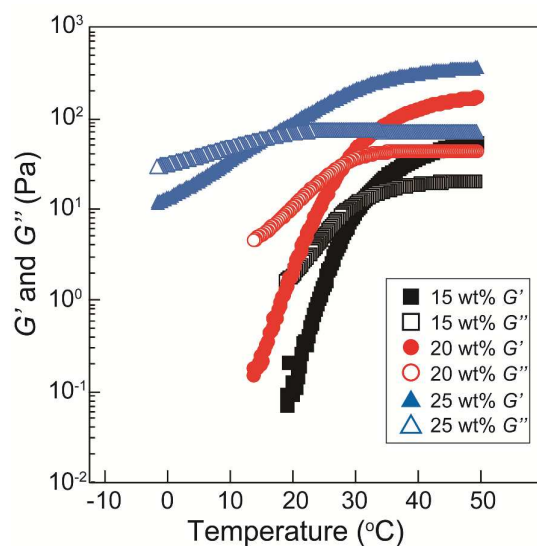

Figure S7. Temperature-dependent dynamic shear moduli ( $G'$  and  $G''$ ) for the three DEGMA<sub>113</sub>–MPC<sub>243</sub>–DEGMA<sub>113</sub> gels with different polymer concentrations measured at a heating rate of 2 °C/min, at strain of 1% and with angular frequency of 10 rad/s (cooling).

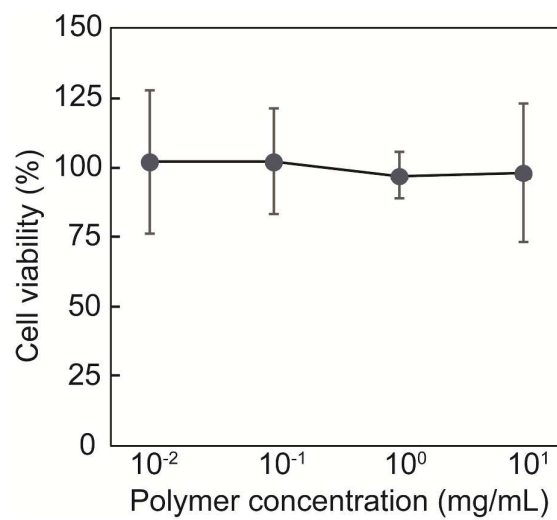

Figure S8. Viability of HeLa cells treated with PDEGMA<sub>113</sub>-*b*-PMPC<sub>243</sub>-*b*-PDEGMA<sub>113</sub> for 24 h.
